# Supplementary material for: Suzuki cross-coupling mediated by tetradentate N-heterocyclic carbene (NHC)–palladium complexes in an environmentally benign solvent
Source: Royal Society of Chemistry journal article supplement (doi:10.1039/b302646a), 2003-01-01
Supplement: b302646a.doc [file b302646a.doc]

# Supplementary data

# Supporting information for

**Suzuki cross-coupling mediated by NHC-palladium complexes in environmentally benign solvent**

Yuanhong Zhao, Yongyun Zhou, Dandan Ma, Jingping Liu, Liang Li, Tony Y. Zhang, and Hongbin Zhang*

**General Experimental**: Infrared (IR) spectra (νmax) were recorded on a Perkin-Elmer 1800 Fourier Transform Infrared spectrophotometer in KBr plates. Proton nuclear magnetic resonance (1H-NMR) spectra were recorded on a Bruker Avance 300 spectrometer at 300 MHz. Carbon-13 nuclear magnetic resonance (13C-NMR) was recorded on Bruker Avance 300 spectrometer at 75.5 MHz. HRMS was recorded on API QSTAR Pulsar I System. MS (FAB+) spectra were recorded on VG AutoSpec 3000 spectrometer. Chemical shifts are reported as δ values in parts per million (ppm) relative to tetramethylsilane (TMS) for all recorded NMR spectra. Low resolution Mass spectra were recorded on Finnigan Trace 2000 GC-MS spectrometer. Starting materials and reagents used in reactions were obtained commercially from Acros, Aldrich, Fluka and were used without purification, unless otherwise indicated. Anhydrous 1,4-dioxane was freshly distilled from sodium benzophenone ketyl. Reactions carried out under argon were degassed by high vacuum and purged with argon at least three times. No precaution should be excised when reactions are carried out under air.

**General Method for Preparation of Ligands 1 to 3**: 1-Mesitylimidazole [1-(2,6-Diisopropylphenyl)imidazole or 1-*tert*-butylimidazole] (4.4 mmol) and 1,2,4,5-tetrabromomethylbenzene (4 mmol) were stirred in toluene (10 ml) at reflux for 16 hours. The precipitate was filtered and washed with dry ethyl ether (3 x 10 ml) to afford the product (90-95%) as a white powder.

**Compound 1**: **IR**: νmax (KBr) cm–1: 3436 (s), 3119 (m), 3071 (m), 2966 (s), 2931 (m), 2871 (m), 1619 (w), 1546 (m), 1467 (m), 1460 (m), 1404 (w), 1388 (w), 1368 (m), 1313 (w), 1183 (m), 1145 (w), 1104 (w), 1069 (w), 1002 (w), 1018 (w), 958 (w), 936 (w). **1H-NMR** (300MHz, DMSO): δ 10.15 (4H, s, Himidazole-5), 8.29 (4H, t, *J* = 1.3 Hz, Himidazole-3), 8.23 (4H, t, *J* = 1.3 Hz, Himidazole-2), 7.99 (2H, s, Hbenzene), 7.63 (4H, t, *J* = 7.8 Hz, H2,6-diisopropylbenzene-4), 7.45 (8H, d, *J* = 7.8 Hz, H2,6-diisopropylbenzene-3,5), 5.99 (8H, s, Hbenzyl), 2.29 (8H, septet, *J* = 6.6 Hz, Me2CH), 1.14 (24H, d, *J* = 6.6 Hz, CH3), 1.12 (24H, d, *J* = 6.6 Hz, CH3). **13C-NMR** (75MHz, DMSO): δ 145.44, 138.42, 135.02, 134.30, 131.91, 130.81, 125.70, 124.80, 123.84, 49.35, 28.47, 24.21, 24.18. **MS** (FAB+) m/z: 1280 (1.5%), 1202 (0.5), 1066 (0.3), 667 (1), 583 (1), 517 (1), 437 (3), 357 (6), 321 (12), 229 (100). **HRMS** (ESI+) m/z Found: 1281.4978 [M+2H−Br]3+, C70H92Br3N8 requires 1281.4995.

**Compound 2**: **IR**: νmax (KBr) cm–1: 3414 (s), 3123 (s), 2979 (m), 1659 (m), 1609 (m), 1548 (s), 1484 (m), 1447 (m), 1402 (m), 1330 (w), 1290 (w), 1199 (m), 1156 (m), 1108 (s), 1069 (w), 1036 (w), 987 (w), 935 (w). **1H-NMR** (300MHz, DMSO): δ 9.77 (4H, s, Himidazole-5), 8.14 (4H, t, *J* = 1.6 Hz, Himidazole-3), 8.04 (4H, t, *J* = 1.6 Hz, Himidazole-2), 7.81 (2H, s, Hbenzene), 7.14 (8H, s, Hmesitylene-3,5), 5.88 (8H, s, Hbenzyl), 2.33 (12H, s , CH3), 2.02 (24H, s, CH3). **13C-NMR** (75MHz, DMSO): δ 140.60, 138.26, 134.92, 134.69, 133.49, 131.46, 129.62, 124.41, 123.74, 49.27, 21.01, 17.76. **MS** (FAB+) m/z: 1116 (2%), 1034 (0.5), 848 (1), 661 (1), 583 (1.5), 499 (3), 314 (16), 279 (4), 187 (100), 146 (10). **HRMS** (ESI+) m/z Found: 1115.3267 [M+4H−Br]5+, C58H70Br3N8 requires 1115.3273.

**Compound 3**: **IR**: νmax (KBr) cm–1: 3497 (m), 3425 (m), 3288 (m), 3129 (m), 3039 (s), 2980 (m), 1630 (w), 1563 (m), 1478 (w), 1446 (w), 1376 (w), 1349 (w), 1319 (w), 1292 (w), 1234 (w), 1209 (s), 1137 (m), 1017 (w). **1H-NMR** (300MHz, DMSO): δ 9.68 (4H, s, Himidazole-5), 8.07 (4H, t, *J* = 1.8 Hz, Himidazole-3), 7.88 (4H, t, *J* = 1.8 Hz, Himidazole-2), 7.62 (2H, s, Hbenzene), 5.72 (8H, s, Hbenzyl), 1.62 (36H, s, CH3). **13C-NMR** (75MHz, DMSO): δ 135.47, 134.53, 132.16, 123.10, 120.89, 60.27, 48.75, 29.39. **MS** (FAB+) m/z: 867 (4%), 785 (1), 662 (4), 537 (2), 458 (3), 309 (3), 252 (11), 217 (14), 195 (7), 125 (100), 69 (35). **HRMS** (ESI+) m/z Found: 867.2659 [M+4H−Br]5+, C38H62Br3N8 requires 867.2647.

**General method for Suzuki cross couplings in 70-95% ethanol**: Palladium (II) acetate (0.1 mmol%), NHC ligand **1** (0.05 mmol%), K2CO3 (2 mmol), aryl bromide (1mmol) and phenyl boronic acid(1.5 mmol) in ethanol (70-95%, 5 mL) were stirred at room temperature under air. The reaction was monitored by thin-layer chromatography. After removal of the solvent, the residue was diluted with water (50 mL) and extracted with diethyl acetate (3X 15mL). The organic phases were combined, washed with brine and dried over anhydrous Na2SO4. The solvent was removed and the residue was chromatographied on silica gel to afford the pure products. All new compounds were characterized by 1H-NMR, 13C-NMR and GC-MS. Yield represents isolated yield based on aryl bromide.

**General method for Suzuki cross couplings in neat water**: **Method A**: Aryl bromides (1 mmol), phenyl boric acid (1.5 mmol), K2CO3 (2 mmol) and solid support based catalyst (0.1 mmol%, 25 mg) which was preformed by mixing palladium (II) acetate (22.5mg) with ligand **1** (75 mg ) in 1,2-dichloroethane (20 mL) overnight then absorbed by alumina or silica gel (2.505g) were stirred in neat water (5 mL) at reflux. The reaction mixture was extracted with ethyl acetate (3 x 10 mL). The organic phases were combined and washed with brine and dried over anhydrous Na2SO4. The solvent was removed and the residue was chromatographied on silica gel to afford the products. **Method B**: Palladium (II) acetate (0.1 mmol%), NHC ligand **1** (0.05 mmol%), K2CO3 (2 mmol), silica gel or alumina (25 mg), aryl bromides (1 mmol) and phenyl boric acid (1.5 mmol) in neat water (5 mL) were stirred at reflux under air for 8 hours. The reaction mixture was extracted with ethyl acetate (3 x 10 mL). The organic phases were combined and washed with brine and dried over anhydrous Na2SO4. The solvent was removed and the residue was chromatographied on silica gel to afford the products.

**3-Methoxybiphenyl**: **1H-NMR** (300MHz, CDCl3): δ 7.60 (2H, dd, *J* = 1.3, *J* = 8.5 Hz), 7.44 (2H, dd, *J* = 7.1, *J* = 8.5 Hz), 7.38-7.32 (2H, m), 7.23 (1H, d, *J* = 6.6 Hz), 7.14 (1H, dd, *J* = 1.7, *J* = 2.4 Hz), 6.91 (1H, ddd, *J* = 0.9, *J* = 2.4, *J* = 8.2 Hz), 3.88 (3H, s, OMe). **13C-NMR** (75MHz, CDCl3): δ 158.91, 141.75, 140.08, 128.72, 127.70, 126.38, 126.17, 118.66, 111.88, 111.65, 54.28. **MS** (m/z): 184.5 (M+, 100%), 154.5 (37), 141.5 (50), 115.4 (58).

**3,4-Dimethoxybiphenyl**: **1H-NMR** (300MHz, CDCl3): δ 7.56 (2H, dd, *J* = 1.5, *J* = 7.8 Hz), 7.42 (2H, dd, *J* = 7.2, *J* = 7.8 Hz), 7.31 (1H, m), 7.15 (1H, dd, *J* = 2.1, *J* = 8.2 Hz), 7.12 (1H, d, *J* = 2.1 Hz), 6.95 (1H, d, *J* = 8.2 Hz), 3.96 (3H, s, OMe), 3.93 (3H, s, OMe). **13C-NMR** (75MHz, CDCl3): δ 149.62, 149.09, 141.47, 134.72, 129.09, 127.25, 127.22, 119.82, 111.99, 111.02, 56.39, 56.36. **MS** (m/z): 214.1 (M+, 100%), 199.0 (40), 171.0 (34), 153.0 (34), 128.0 (35).

**2’,5’-Dimethoxy-2-formylbiphenyl**: **1H-NMR** (300MHz, CDCl3): δ 9.79 (1H, s, CHO), 7.99 (1H, dd, *J* = 1.2, *J* = 7.7 Hz), 7.64 (1H, dt, *J* = 1.2, *J* = 7.6 Hz), 7.48 (1H, dt, *J* = 0.78, *J* = 7.6 Hz), 7.36 (1H, dd, *J* = 0.78, *J* = 7.6 Hz), 6.95 (1H, dd, *J* = 2.8, *J* = 8.8 Hz), 6.91 (1H, d, *J* = 8.8 Hz), 6.87 (1H, d, *J* = 2.8 Hz), 3.81 (3H, s, OMe), 3.68 (3H, s, OMe). **13C-NMR** (75MHz, CDCl3): δ 193.00, 183.58, 154.14, 151.11, 141.97, 134.37, 134.09, 131.40, 128.25, 126.98, 117.66, 114.79, 112.12, 56.30, 56.20. **MS** (m/z): 241.9 (M+, 63%), 210.9 (100), 167.7 (40), 138.8 (23), 127.9 (23).

**4-Methoxybiphenyl**: **1H-NMR** (300MHz, CDCl3): δ 7.58 (2H, dd, *J* = 2.0, *J* = 8.0 Hz), 7.54 (2H, d, *J* = 8.2 Hz), 7.43 (2H, dd, *J* = 7.3, *J* = 8.0 Hz), 7.32 (1H, dd, *J* = 2.0, *J* = 7.3 Hz), 7.00 (2H, d, *J* = 8.2 Hz), 3.86 (3H, s, OMe). **13C-NMR** (75MHz, CDCl3): δ 159.53, 141.23, 134.18, 129.13, 128.56, 127.14, 127.06, 114.59, 55.75. **MS** (m/z): 184.1 (M+, 100%), 169.0 (68), 141.0 (57), 114.9 (52).

**2-Formylbiphenyl**: **1H-NMR** (300MHz, CDCl3): δ 9.99 (1H, s, CHO), 8.04 (1H, dd, *J* = 1.3, *J* = 7.7 Hz), 7.64 (1H, ddd, *J* = 1.3, *J* = 7.7, *J* = 7.8 Hz), 7.50-7.40 (5H, m), 7.40-7.37 (2H, m). **13C-NMR** (75MHz, CDCl3): δ 192.82, 146.38, 138.17, 134.15, 133.95, 131.18, 130.51, 128.84, 128.53, 128.18, 127.98. **MS** (m/z): 182.1 (M+, 65%), 181.0 (100), 153.0 (45), 152.0 (52).

**3-Phenylquinoline**: **1H-NMR** (300MHz, CDCl3): δ 9.18 (1H, d, *J* = 2.3 Hz), 8.25 (1H, d, *J* = 2.3 Hz), 8.15 (1H, d, *J* = 7.3 Hz), 7.84 (1H, d, *J* = 8.1 Hz), 7.68 (3H, ddd, *J* = 1.4, *J* = 1.5, *J* = 8.1 Hz), 7.57-7.48 (3H, m), 7.42 (1H, ddd, *J* = 1.4, *J* = 1.5, *J* = 7.3 Hz). **13C-NMR** (75MHz, CDCl3): δ 150.27, 147.66, 138.20, 134.21, 133.67, 129.82, 129.58, 129.55, 128.53, 128.42, 127.81, 127.42. **MS** (m/z): 205.1 (M+, 100%), 204.1 (65), 176.0 (25).

**9-Phenylphenanthrene**: **1H-NMR** (300MHz, CDCl3): δ 8.82 (1H, d, *J* = 8.2 Hz), 8.76 (1H, d, *J* = 7.9 Hz), 7.98 (1H, d, *J* = 8.2 Hz), 7.94 (1H, dd, *J* = 1.5, *J* = 7.9 Hz), 7.74 (1H, s), 7.70 (2H, dd, *J* = 1.3, *J* = 7.8 Hz), 7.66 (1H, dd, *J* = 1.0, *J* = 7.8 Hz), 7.64-7.49 (6H, m). **13C-NMR** (75MHz, CDCl3): δ 141.26, 139.23, 132.01, 131.59, 131.08, 130.52, 130.41, 129.12, 128.76, 127.97, 127.82, 127.38, 127.30, 127.03, 126.95, 126.90, 123.36, 122.99. **MS** (m/z): 254.1 (M+, 100%), 253.1 (73), 252.1 (55), 250.1 (25), 126.0 (15).

**4-Methylbiphenyl**: **1H-NMR** (300MHz, CDCl3): δ 7.52 (2H, m), 7.35 (2H, dt, *J* = 1.5, *J* = 8.4 Hz), 7.28 (2H, dd, *J* = 1.5, *J* = 8.3 Hz), 7.17 (1H, dd, *J* = 3.0, *J* = 4.8 Hz), 6.96 (2H, d, *J* = 8.4 Hz), 2.22 (3H, s, Me). **13C-NMR** (75MHz, CDCl3): δ 136.04, 133.09, 131.63, 131.19, 129.86, 129.09, 128.38, 127.38, 21.00. **MS** (m/z): 168.0 (M+, 100%), 166.9 (80), 164.8 (30), 153.0 (20), 151.9 (30), 114.8 (17), 81.9 (18).

**3-Phenylpyridine**: **1H-NMR** (300MHz, CDCl3): δ 8.85 (1H, d, *J* = 2.2 Hz), 8.58 (1H, dd, *J* = 1.5, *J* = 7.8 Hz), 7.84 (1H, ddd, *J* = 1.6, *J* = 2.2, *J* = 7.8 Hz), 7.58 (1H, t, *J* = 1.6 Hz), 7.55 (1H, t, *J* = 1.5Hz), 7.49-7.34 (4H, m). **13C-NMR** (75MHz, CDCl3): δ 148.85, 148.71, 138.21, 137.03, 134.74, 129.48, 128.50, 127.54, 123.94. **MS** (m/z): 155.0 (M+, 93%), 153.8 (100), 127.9 (35), 126.6 (75), 101.6 (40).

**5-Phenylpyrimidine**: **1H-NMR** (300MHz, CDCl3): δ 9.20 (1H, s), 8.60 (2H, s), 7.60-7.44 (5H, m). **13C-NMR** (75MHz, CDCl3): δ 157.86, 155.33, 134.75, 134.63, 129.85, 129.44, 127.40. **MS** (m/z): 155.7 (M+, 100%), 101.8 (82), 75.8 (15), 50.9 (17), 49.7 (13).

**2’-Formyl-2-methoxybiphenyl**: **1H-NMR** (300MHz, CDCl3): δ 9.79 (1H, s), 8.00 (1H, dd, *J* = 1.4, *J* = 7.8 Hz), 7.65 (1H, ddd, *J* = 1.4, *J* = 7.5, *J* = 7.6 Hz), 7.48 (1H, t, *J* = 8.3 Hz), 7.42 (1H, dt, *J* = 1.8, *J* = 8.3 Hz), 7.36 (1H, dd, *J* = 1.2, *J* = 7.5 Hz), 7.27 (1H, dd, *J* = 1.8, *J* = 7.5 Hz), 7.09 (1H, ddd, *J* = 1.2, *J* = 7.5, *J* = 7.6 Hz), 6.98 (1H, d, *J* = 8.3 Hz), 3.74 (3H, s, OMe). **13C-NMR** (75MHz, CDCl3): δ 192.79, 156.62, 141.94, 134.12, 133.81, 131.54, 131.32, 130.11, 127.87, 126.93, 126.71, 121.13, 110.74, 55.51. **MS** (m/z): 211.8 (M+, 50%), 180.9 (100), 151.9 (35), 140.7 (35), 138.8 (32), 114.8 (37).

**1-(2,5-Dimethoxyphenyl)-2-methoxynaphthalene**: **1H-NMR** (300MHz, CDCl3): δ 7.90 (1H, d, *J* = 9.0 Hz), 7.86-7.83 (1H, m), 7.44-7.34 (4H, m), 7.03 (1H, d, *J* = 8.9 Hz), 6.97 (1H, dd, *J* = 2.9, *J* = 8.9 Hz), 6.84 (1H, d, *J* = 2.9 Hz), 3.88 (3H, s, OMe), 3.81 (3H, s, OMe), 3.66 (3H, s, OMe). **13C-NMR** (75MHz, CDCl3): δ 151.60, 153.99, 152.54, 133.97, 129.59, 129.45, 128.25, 126.91, 126.64, 125.65, 123.86, 122.30, 118.37, 114.52, 114.04, 113.21, 57.36, 56.99, 56.10. **MS** (m/z): 294.0 (M+, 100%), 278.9 (25), 247.8 (65), 204.8 (23).

**2-Methoxybiphenyl**: **1H-NMR** (300MHz, CDCl3): δ 7.52 (2H, ddd, *J* = 1.2, *J* = 1.5, *J* = 8.1 Hz), 7.39 (2H, ddd, *J* = 1.2, *J* = 1.5, *J* = 7.3 Hz), 7.35-7.29 (3H, m), 7.04 (1H, dd, *J* = 1.5, *J* = 7.3 Hz), 6.98 (1H, dd, *J* = 1.4, *J* = 9.8 Hz), 3.80 (3H, s, OMe). **13C-NMR** (75MHz, CDCl3): δ 156.86, 138.94, 131.29, 130.66, 129.94, 129.01, 128.38, 127.31, 121.22, 111.63, 55.95. **MS** (m/z): 183.7 (M+, 100%), 168.6 (90), 140.8 (60), 138.8 (20), 114.8 (61).

**2-Aminobiphenyl**: **1H-NMR** (300MHz, CDCl3): δ 7.47-7.42 (4H, m), 7.39-7.33 (1H, m), 7.20-7.13 (2H, m), 6.85 (1H, d, *J* = 7.5 Hz), 6.80 (1H, t, *J* = 7.9 Hz), 3.58 (2H, s). **13C-NMR** (75MHz, CDCl3): δ 143.77, 139.88, 130.85, 129.49, 129.20, 128.89, 128.11, 127.56, 119.12, 116.05. **MS** (m/z): 169.0 (M+, 95%), 168.0 (100), 166.7 (65), 138.8 (10), 114.7 (15), 83.3 (18).

**2-(1’,3’-Dioxolan-2’-yl) biphenyl**: **1H-NMR** (300MHz, CDCl3): δ 7.61 (1H, dd, *J* = 2.0, *J* = 3.7 Hz), 7.51-7.36 (6H, m), 7.28 (2H, dd, *J* = 2.4, *J* = 3.7 Hz), 6.17 (1H, s), 4.16 (2H, m), 4.07 (2H, m). **13C-NMR** (75MHz, CDCl3): δ 130.69, 130.44, 130.12, 130.09, 129.40, 128.35, 128.00, 127.95, 127.57, 127.20, 101.15, 65.86. **MS** (m/z): 226.0 (M+, 40%), 224.5 (60), 180.9 (100), 164.8 (50), 151.9 (82), 72.9 (30).

**4-Acetylbiphenyl**: **1H-NMR** (300MHz, CDCl3): δ 8.04 (2H, d, *J* = 8.4 Hz), 7.69 (2H, d, *J* = 8.4 Hz), 7.63 (2H, dd, *J* = 1.6, *J* = 7.0 Hz), 7.51-7.40 (3H, m), 2.65 (3H, s, Me). **13C-NMR** (75MHz, CDCl3): δ 198.17, 146.18, 140.27, 136.25, 129.35, 129.31, 128.63, 127.67, 127.62, 27.07. **MS** (m/z): 196.0 (M+, 34%), 181.0 (65), 152.0 (70), 50.9 (28), 42.9 (100).

**2-Benzylamino-5-methoxybiphenyl**: **1H-NMR** (300MHz, CDCl3): δ 7.46 (4H, m), 7.35 (1H, m), 7.33 (4H, m), 7.23 (1H, m), 6.78 (1H, dd, *J* = 3.0, *J* = 8.4 Hz), 6.76 (1H, d, *J* = 3.0 Hz), 6.60 (1H, d, *J* = 8.4 Hz), 4.28 (2H, s), 3.75 (3H, s, Me). **13C-NMR** (75MHz, CDCl3): δ 152.15, 140.19, 139.74, 139.67, 128.72, 129.31, 128.95, 128.94, 127.78, 127.52, 127.39, 116.92, 114.27, 112.59, 56.25, 49.43. **MS** (m/z): 288.9 (M+, 100%), 273.9 (18), 197.8 (58), 182.6 (65), 166.7 (67), 90.8 (96).

**2-Phenylpyridine**: **1H-NMR** (300MHz, CDCl3): δ 8.69 (1H, d, *J* = 4.4 Hz), 7.91 (2H, dd, *J* = 1.5, *J* = 7.8 Hz), 7.72-7.63 (2H, m), 7.43-7.31 (3H, m), 7.18-7.13 (1H, m). **13C-NMR** (75MHz, CDCl3): δ 158.16, 150.34, 140.07, 137.43, 129.62, 129.42, 127.59, 122.77, 121.26. **MS** (m/z): 155.0 (M+, 100%), 153.9 (97), 128.0 (15), 127.0 (20), 76.9 (23).

**2,4-Dimethoxybiphenyl**: **1H-NMR** (300MHz, CDCl3): δ 7.49 (1H, d, *J* = 8.4 Hz), 7.48 (1H, dd, *J* = 2.0, *J* = 8.4 Hz), 7.37 (1H, d, *J* = 6.3 Hz), 7.34 (1H, d, *J* = 6.3 Hz), 7.28-7.13 (2H, m), 6.54 (1H, t, *J* = 2.4 Hz), 6.52 (1H, t, *J* = 2.8 Hz), 3.79 (3H, s, OMe), 3.74 (3H, s, OMe). **13C-NMR** (75MHz, CDCl3): δ 160.82, 157.96, 138.90, 131.76, 129.96, 128.46, 126.97, 124.11, 105.15, 99.52, 55.99, 55.85. **MS** (m/z): 214.1 (M+, 100%), 199.0 (25), 184.0 (21), 171.0 (20), 128.0 (30).
